# Supplementary material for: Gas-Chromatography Mass-Spectrometry (GC-MS) Based Metabolite Profiling Reveals Mannitol as a Major Storage Carbohydrate in the Coccolithophorid Alga Emiliania huxleyi
Source: Metabolites. 2013 Mar 11;3(1):168–84. doi: 10.3390/metabo3010168 (PMC3901260; doi:10.3390/metabo3010168)
Supplement: Supplementary File 1 — Supplementary Information (PDF, 21 KB) [file metabolites-03-00168-s001.pdf]

Supplementary Information

**Figure 1.** Optimization of extraction procedure. **(a)** Effect of incubation time on the efficiency of metabolite extraction. Following the addition of 90% methanol and vortex, cells are incubated at 4°C for 30 min or 60 min with shake. The amounts of extracted chlorophyll *a* are determined as an indicator of metabolite extraction. **(b)** Effect of sonication. The samples are sonicated for 3 min after vortex and incubated for 60 min. In both experiments  $5.8 \times 10^6$  cells are extracted with 2.0 ml of methanol solution. Values are means  $\pm$  SEM from 4 technical replicates. Asterisk indicates the condition showed statistically significant difference from vortexed samples by *t*-test ( $p<0.05$ ).

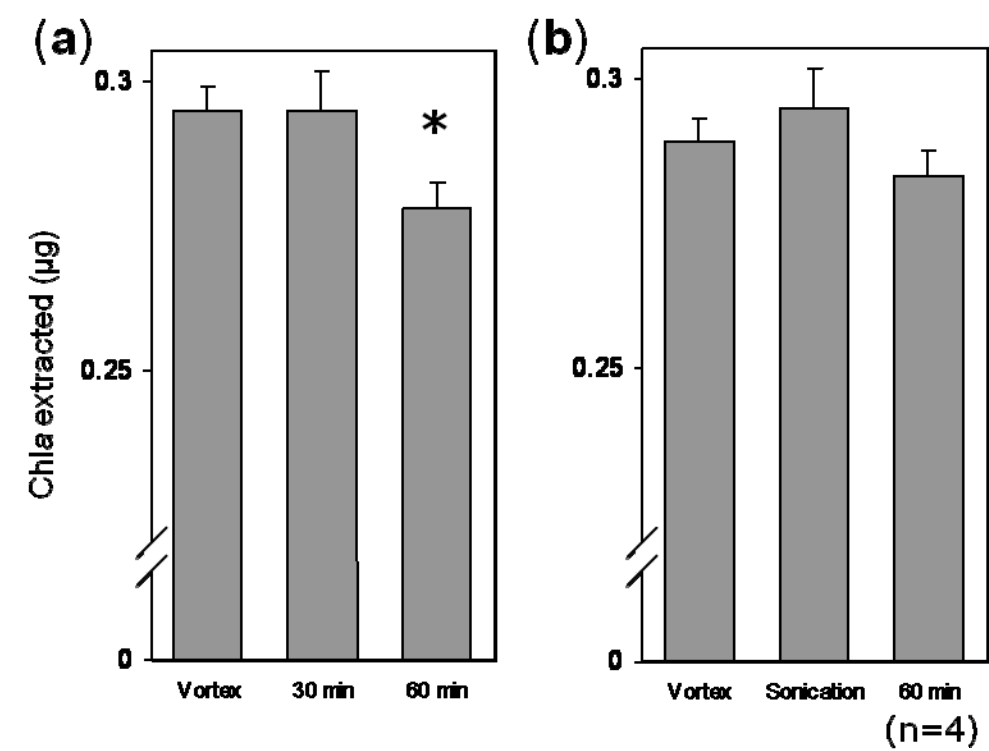

**Table 1.** Number of metabolite detected from different number of cells.

| Cell number (x10 <sup>6</sup> cells) | 1.16 | 2.32 | 5.80 | 11.6 | 23.2 |
|--------------------------------------|------|------|------|------|------|
| Number of detected metabolites       | 2    | 9    | 17   | 26   | 26   |
| Number of overloaded metabolites     | 0    | 0    | 0    | 0    | 2    |
