# Supplementary material for: Gas-Chromatography Mass-Spectrometry (GC-MS) Based Metabolite Profiling Reveals Mannitol as a Major Storage Carbohydrate in the Coccolithophorid Alga Emiliania huxleyi
Source: Metabolites. 2013 Mar 11;3(1):168–84. doi: 10.3390/metabo3010168 (PMC3901260; doi:10.3390/metabo3010168)
Supplement: Supplementary File 2 — Supplemental Table (XLS, 46 KB) [file metabolites-03-00168-s002.xls]

## Sheet: Checklist
	Supplemental Table S1. Metabolite Reporting Guidelines (Checklist table)
	Level	Aspect	Information	Fill in
	general aspect	Type of metabolome analysis	targeted metabolite analysis	TRUE
			non-targeted metabolite class scale profiling	FALSE
			non-targeted metabolome scale profiling	FALSE
			non-targeted finger printing of mass features	FALSE
		Type of quantification	absolute or quantification	Relative quantification
		Type of reference samples	chemically defined	standard reference compounds aquired in chemical companies
			biologically defined	-
		Type of replication	analytical (same analytical sample preparation)	1
			technological (same biological preparation)	4
			biological (same experimental condition)	4
			full experiment	16
		Type of technology	reference publication	Lisec et al (2006)
		Sample preparation		chemical derivatized
			method of chromatography/separation	Lisec et al (2006)
			method of ionization	- 70 MeVolt hard ionization
			method of detection	electron impact ionization
	metabolite/mass feature	Metabolite	metabolite name	see table 2
			metabolite sum formula	see table 2
			metabolite structure and public source of metabolite identifier	Metabolites were identified in comparison to database entries of authentic standards (Kopka et al., 2005; Schauer et al., 2005).
		Identification	identification process	manually supervized with TagFinder software
			by authentic mass isotopomer added to one or all biological sample(s)	FALSE
			by authentic reference compound within a co-processed reference mixture	FALSE
			by authentic reference compound previously mapped to the analytical system	TRUE
			reference library	Metabolites were identified in comparison to database entries of authentic standards (Kopka et al., 2005; Schauer et al., 2005)
			type of mass spectrum
			by match of molecular mass (single mass fragment)	A minimum of 3 unique mass fragments was required for the relative quantification of metabolite pool sizes
			by match of fragments	YES
			by match of fragmentation pattern	YES
			by match of mass spectrum to reference library	Mass spectral matching thresholds were: Match > 650 (best match = 1000) and RI-deviation < 1.0%
			type of retention index
			by match of retention time (index) to reference library	fatty acid methylesters (FAMEs)
		Quantification	type of quantification	relative quantification by internal standard
		Validity testing	Recovery testing (chemical analog)	not performed
			Recovery testing (internally added mass isotopomer)	not performed
			Recovery testing (mixture of most divergent samples from the experiment)	not performed
			Test for linear range	performed
			Limit of quantification (LOQ)	not performed
			Limit of detection (LOD)	not performed
			Mass spectral matching thresholds were: Match > 650 (best match = 1000) and RI-deviation < 1.0%

## Sheet: Overview
Supplemental Table S1. Overview of the metabolite reporting list.
GC-TOF-MS metabolites
	A	B	C	D	E	F	G	H	I
1
2	Experiment title:		Metabolite profiling of a haptophyta alga, Emiliania huxleyi
3	Organism/Plant species:		Emiliania huxleyi
4	Organ/tissue:		cell
5	Analytical tool:		GC-TOF-MS
6
7	Peak/compound no.- number referenced back to the main text
8	Ret . Time- Time expected, Tag Time Index and Time deviation
9	Putative Name- putative identification of the metabolite/derivative
10	Corresponding metabolite name in literature
11	Mol. Formula- molecular formula of the metabolite or its FA adduct;
12	Mass to charge ratio (m/z)
13	(S)- identification confirmed by a standard compound
14	I, II, III- different isomers
15	Identification level (A; B; C; D)- (A) standard or NMR; (B) MS/MS; (C) MSE; (D) MS only
16
17	Peak/Compound no.	Time Expected	Tag Time Index	Time Deviation	Putative metabolite name (Derivative)	Corresponding Metabolite in Literature	Metabolite Class	Mol formula	Mass to charge ratio (m/z)	Species detected before	References	Identification level (A-D)
18	1	658337	209361	0.49	M000026_A110001-101_METB_208565_TOF_Alanine, DL- (2TMS)	Alanine	Amino acids	C3H7NO2	116	Tomato, Arabidopsis, potato, Lotus japonicus		A
19	2	354060	271424	-0.02	M000030_A122001-101_METB_271580_TOF_Valine, DL- (2TMS)	Valine	Amino acids	C5H11NO2	144	Tomato, Arabidopsis, potato, Lotus japonicus		A
20	3	271580	304879	-0.05	M000025_A129002-101_METB_301020_TOF_Leucine, DL- (2TMS)	Leucine	Amino acids	C6H13NO2	158	Tomato, Arabidopsis, potato, Lotus japonicus		A
21	4	457283	318740	-0.13	M000017_A132002-101_METB_319193_TOF_Isoleucine, L- (2TMS)	Isoleucine	Amino acids	C6H13NO2	158	Tomato, Arabidopsis, potato		A
22	5	581860	324768	-0.22	M000031_A133001-101_METB_325180_TOF_Glycine (3TMS)	Glycine	Amino acids	C2H5NO2	174	Tomato, Arabidopsis, potato, Lotus japonicus		A
23	6	592883	344638	-0.3	M000073_A135003-101_METB_345050_TOF_Glyceric acid, DL- (3TMS)	Glycerate	Organic acid	C3H6O4	133	Tomato, Arabidopsis, potato		A
24	7	452200	357591	0.04	M000015_A138001-101_METB_357523_TOF_Serine, DL- (3TMS)	Serine	Amino acids	C3H7NO3	204	Tomato, Arabidopsis, potato		A
25	8	590400	367121	-0.12	M000016_A140001-101_METB_368365_TOF_Threonine, DL- (3TMS)	Threonine	Amino acids	C4H9NO3	218	Tomato, Arabidopsis, potato		A
26	9	507780	409058	-0.07	M000024_A141001-101_METB_409350_TOF_Serine, O-acetyl-, DL- (2TMS)	O-acetylserine	Amino acids	C5H9NO4	132	Tomato, Arabidopsis, potato		A
27	10	492650	430340	-0.03	M000478_A147004-101_METB_430430_TOF_Decanoic acid, n- (1TMS)	Decanoate	Fatty acids	C10H20O2	117			A
28	11	291783	457367	-0.01	M000033_A152002-101_METB_457283_TOF_Aspartic acid, L- (3TMS)	Aspartate	Amino acids	C4H7NO4	232	Tomato, Arabidopsis, potato		A
29	12	574230	458394	0.02	M000078_A156001-101_METB_458330_TOF_Threonic acid (4TMS)	Threonate	Hydroxy acid	C4H8O5	292	Tomato, Arabidopsis		A
30	13	325180	500929	0.07	M000582_A168002-101_METB_500740_TOF_Ribose, D- (1MEOX) (4TMS)	Ribose	Sugar	C10H10O5	103			A
31	14	319193	507845	0.04	M000036_A163001-101_METB_507780_TOF_Glutamic acid, DL- (3TMS)	Glutamate	Amino acids	C5H9NO5	246	Tomato, Arabidopsis, potato, Lotus japonicus		A
32	15	190250	527724	-0.02	M000479_A166003-101_CONT-METB_527860_TOF_Dodecanoic acid, n- (1TMS)	Dodecanoate	Fatty acids	C12H24O2	117			A
33	16	615467	530824	-0.03	M000011_A164001-101_METB_531145_TOF_Phenylalanine, DL- (2TMS)	Phenylalanine	Amino acids	C9H11NO2	218	Tomato, Arabidopsis, potato, Lotus japonicus		A
34	17	440995	579440	0.01	M000606_A187002-101_METB_579380_TOF_Fructose, D- (1MEOX) (5TMS)	Fructose	Sugar	C6H12O6	217	Tomato, Arabidopsis, potato, Lotus japonicus		A
35	18	474325	582209	-0.26	M000687_A193002-101_METB_583850_TOF_Mannitol, D- (6TMS)	Mannitol	Polyol	C6H14O6	217			A
36	19	653910	587671	-0.09	M000055_A193001-111-7_METB_588295_TRUE_VAR5_ALK_Sorbitol, U-13C- (6TMS)	U-13C-sorbitol	Sugar	C6H14O6	323			A
37	20	570427	590518	0.07	M000040_A189002-101_METB_590400_TOF_Glucose, D- (1MEOX) (5TMS)	Glucose	Sugar	C6H12O6	160	Tomato, Arabidopsis, potato, Lotus japonicus		A
38	21	531145	592858	0.09	M000069_A182004-101_METB-METB_592883_TOF_Citric acid (4TMS)	Citrate	Tricarboxylic acid	C6H8O7	273	Tomato, Arabidopsis, potato, Lotus japonicus		A
39	22	433728	615789	0.09	M000014_A192003-101_METB_615467_TOF_Lysine, L- (4TMS)	Lysine	Amino acids	C6H14N2O2	156	Tomato, Arabidopsis, potato, Lotus japonicus		A
40	23	338693	624986	0.01	M000082_A185002-101_METB-METB_624990_TOF_Dehydroascorbic acid dimer (TMS)	Dehydroascorbate	Hydroxy acid	C6H6O6	173	Tomato, Arabidopsis, potato		A
41	24	577930	653846	0	M000060_A209002-101_METB_653910_TOF_Inositol, myo- (6TMS)	Myoinositol	Polyol	C6H14O6	191	Tomato, Arabidopsis, potato		A
42	25	365427	841120	0.05	M000044_A264001-101_METB_840783_TOF_Sucrose, D- (8TMS)	Sucrose	Sugar	C12H22O11	361	Tomato, Arabidopsis, potato, Lotus japonicus		A
43	26	368365	1070456	0	M000626_A316001-101_METB_1070600_TOF_Tocopherol, alpha- (1TMS)	α-tocopherol	Terpenoid	C29H50O5	236			A
44	27	815200	1083330	0.19	M000269_A355003-101_METB_1081300_TOF_Maltotriose 11TMS/1MeOx BP	Maltotriose	Sugar	C18H32O16	204			A
